# Supplementary material for: Burden of foodborne disease due to bacterial hazards associated with beef, dairy, poultry meat, and vegetables in Ethiopia and Burkina Faso, 2017
Source: Frontiers journal article supplement (doi:10.3389/fsufs.2022.1024560), 2022-10-28
Supplement: Table_4.DOCX [file Table_4.DOCX]

Table S4_1. Foodborne disease burden for three bacterial hazards in Burkina Faso and Ethiopia in 2010 (children under 5 years of age) according to WHO FERG (1)

1. Burkina Faso

| Hazard | Incidence  (x 1,000) | Incidence per 100,000 | Mortality | Mortality per 100,000 | DALY (x 1000) | DALY per 100,000 |
| --- | --- | --- | --- | --- | --- | --- |
| *Campylobacter* spp. | 370 (59-1,330)^ | 13,000 (210-46,700) | 91 (37-163) | 3.19 (1.30-5.75) | 8.78 (3.70-15.6) | 309 (29.7-548) |
| Enterotoxigenic *E. coli* | 112 (15-303) | 3,920 (510-10,700) | 154 (31-351) | 5.41 (1.10-12.3) | 13.9 (2.8-31.6) | 489 (100-1,110) |
| Non-typhoidal *S. enterica* | 85 (3-337) | 3,000 (90-11,900) | 310 (85-560) | 11.8 (3.2-21.0) | 304 (8.2-53.7) | 1,660 (287-1,890) |

^ Mean (95% uncertainty interval)

1. Ethiopia

| Hazard | Incidence  (x 1,000) | Incidence per 100,000 | Mortality | Mortality per 100,000 | DALY (x 1000) | DALY per 100,000 |
| --- | --- | --- | --- | --- | --- | --- |
| *Campylobacter* spp. | 1,830 (30-6,620)^ | 12,900 (200-46,500) | 446 (173-807) | 3.13 (1.07-9.57) | 43.4 (17.5-76.9) | 304 (123-540) |
| Enterotoxigenic *E. coli* | 547 (61-1,500) | 3,840 (430-10,600) | 757 (102-1,740) | 5.31 (0.71-12.2) | 68.4 (9.2-157) | 480 (65-1,100) |
| Non-typhoidal *S. enterica* | 403 (42-1,630) | 2,830 (30-11,400) | 572 (119-1,090) | 4.02 (0.84-7.66) | 51.8 (10.8-98.4) | 364 (76-691) |

^ Mean (95% uncertainty interval)

Table S4_2. Foodborne disease burden for three bacterial hazards in Burkina Faso and Ethiopia in 2017 (children under 5 years of age) according to WHO FERG (1), updated according to the Global Burden of Disease study (8)

1. Burkina Faso

| Hazard | Incidence  (x 1,000) | Incidence per 100,000 | Mortality | Mortality per 100,000 | DALY (x 1000) | DALY per 100,000 |
| --- | --- | --- | --- | --- | --- | --- |
| *Campylobacter* spp. | 506 (8-1,810)^ | 15,400 (250-55,200) | 119 (48-215) | 3.62 (1.47-6.57) | 11.6 (4.9-20.6) | 354 (148-628) |
| Enterotoxigenic *E. coli* | 145 (19-401) | 4,430 (570-11,200) | 206 (36-513) | 6.27 (1.1-15.6) | 18.2 (3.4-44.4) | 556 (100-1,350) |
| Non-typhoidal *S. enterica* | 90 (3-360) | 2,750 (850-14,400) | 310 (85-560) | 9.45 (2.59-17.1) | 28.0 (7.7-50.6) | 852 (234-1,540) |

^ Mean (95% uncertainty interval)

1. Ethiopia

| Hazard | Incidence  (x 1,000) | Incidence per 100,000 | Mortality | Mortality per 100,000 | DALY (x 1000) | DALY per 100,000 |
| --- | --- | --- | --- | --- | --- | --- |
| *Campylobacter* spp. | 1,910 (310-6,880)^ | 11,800 (200-42,800) | 440 (170-800) | 2.71 (1.07-5.00) | 42.9 (17.4-76.1) | 267 (108-473) |
| Enterotoxigenic *E. coli* | 547 (61-1,5000) | 3,250 (2,960-8,940) | 670 (89-1,530) | 4.13 (0.55-9.51) | 60.3 (8.0-138) | 374 (50-858) |
| Non-typhoidal *S. enterica* | 410 (4-1,660) | 2,560 (270-10,300) | 542 (112-1,030) | 3.37 (0.70-6.13) | 60.3 (8.0-138) | 305 (4-579) |

^ Mean (95% uncertainty interval)
